# Supplementary material
Source: publisher figshare collection journal article supplement (https://acs.figshare.com/ndownloader/files/3779575)
Supplement: Supplementary file 1 [file 3779575]

Supporting Information

of

Activable Cell-Penetrating Peptide (ACPP)

Conjugated Prodrug for Tumor Targeted Drug

Delivery

*Hong Cheng,<sup>1</sup> Jing-Yi Zhu,<sup>1</sup> Xiao-Ding Xu,<sup>1</sup> Wen-Xiu Qiu,<sup>1</sup> Qi Lei,<sup>1</sup> Kai Han,<sup>1</sup> Yin-Jia Cheng,<sup>1</sup> Xian-Zheng Zhang<sup>1,2,\*</sup>*

<sup>1</sup> Key Laboratory of Biomedical Polymers of Ministry of Education & Department of Chemistry, Wuhan University, Wuhan 430072, PR China

<sup>2</sup> The Institute for Advanced Studies, Wuhan University, Wuhan 430072, PR China

\* To whom correspondence should be addressed. Tel. & Fax: 86-27-68754509.

E-mail address: xz-zhang@whu.edu.cn (X. Z. Zhang).

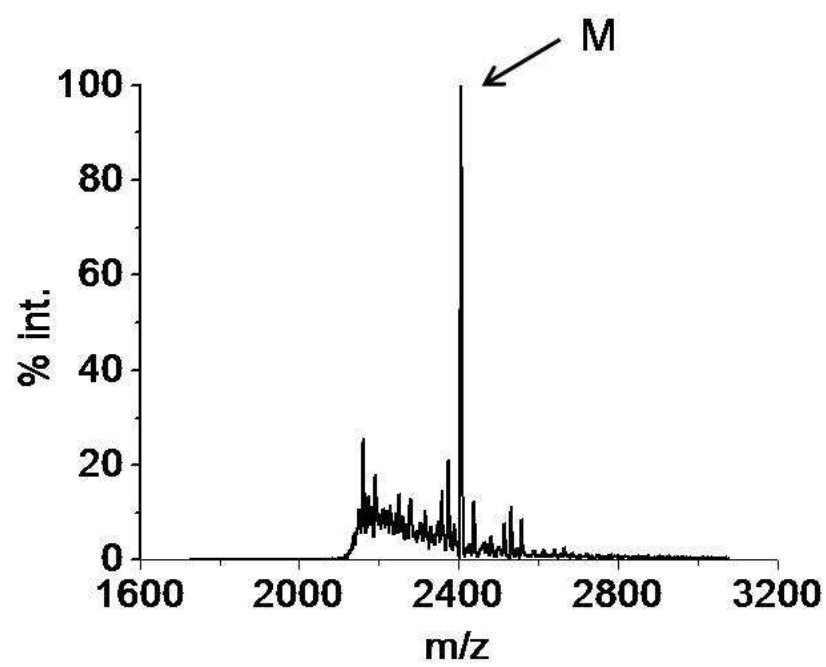

Figure S1. MOLDI-TOF-MS profile of ACPP.

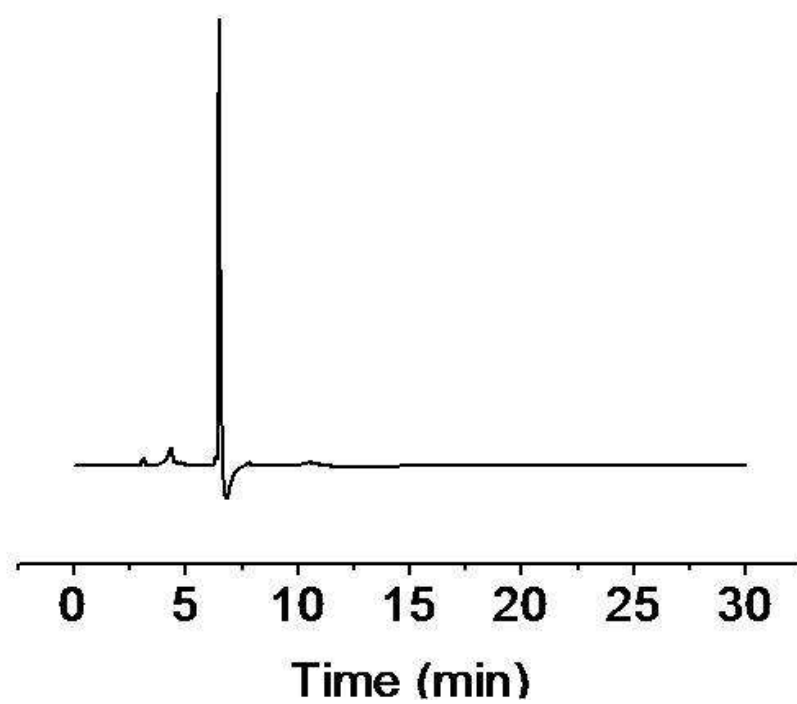

Figure S2. HPLC profile of ACPP.

ESI-2014-8-28-CH-3 #36-37 RT: 1.00-1.03 AV: 2 NL: 2.95E7  
T: + c ESI Full ms [150.00-2000.00]

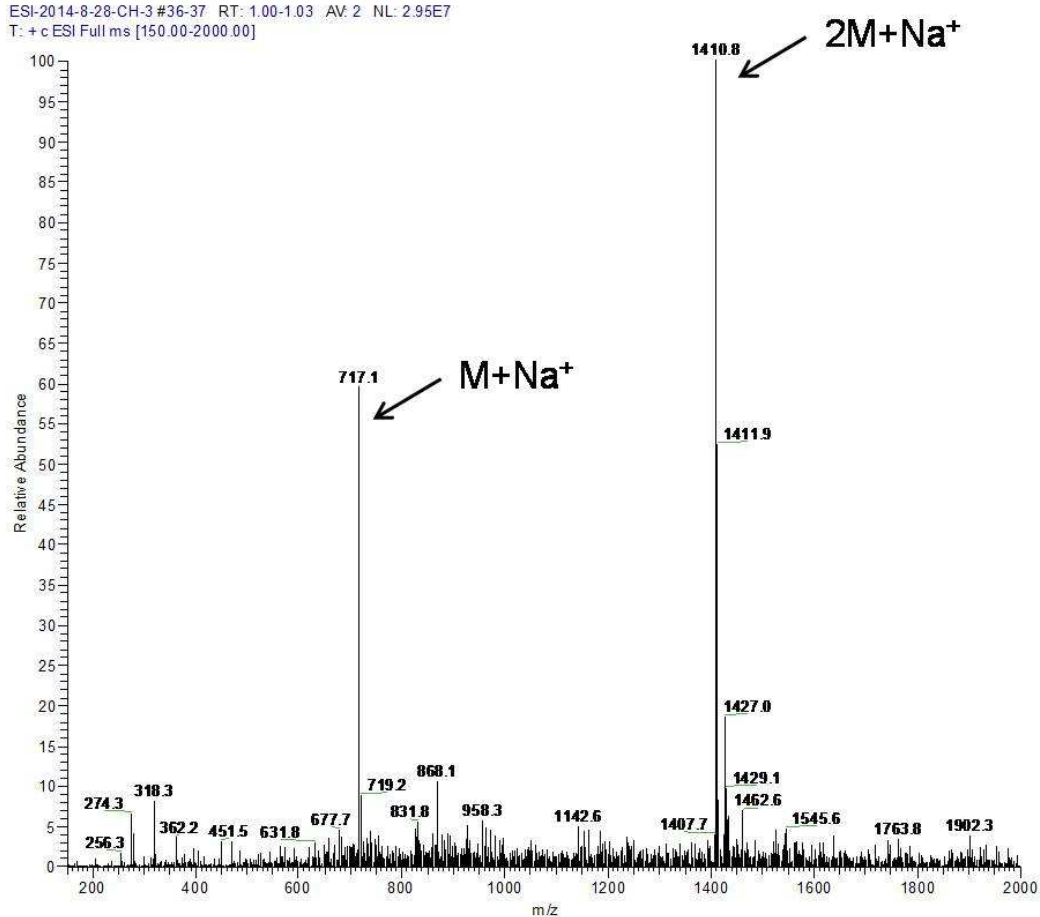

Figure S3. ESI-MS profile of DOX-SMP.

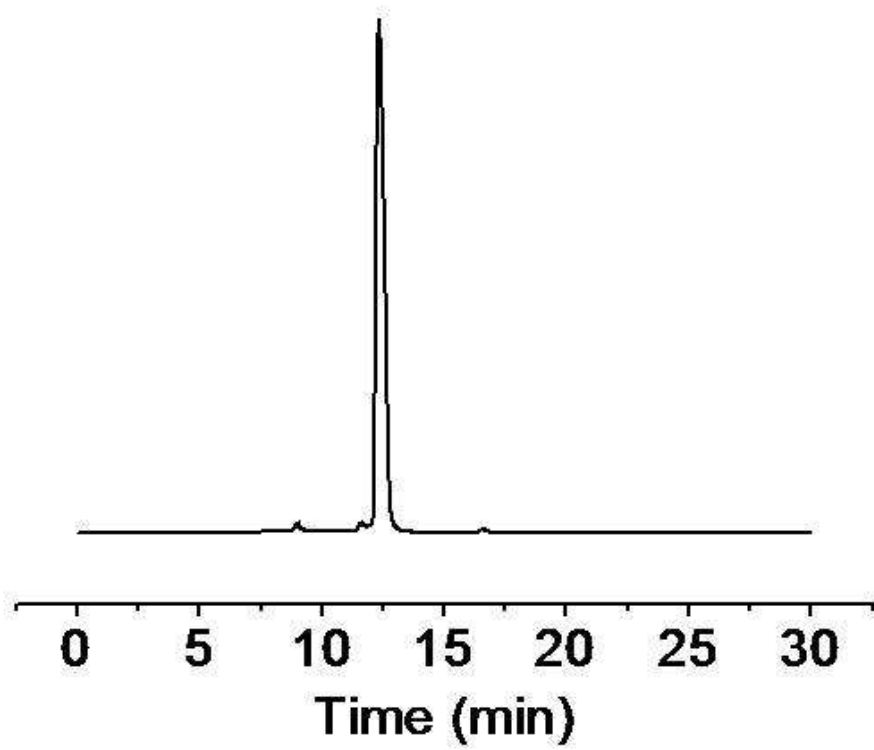

Figure S4. HPLC profile of DOX-SMP.

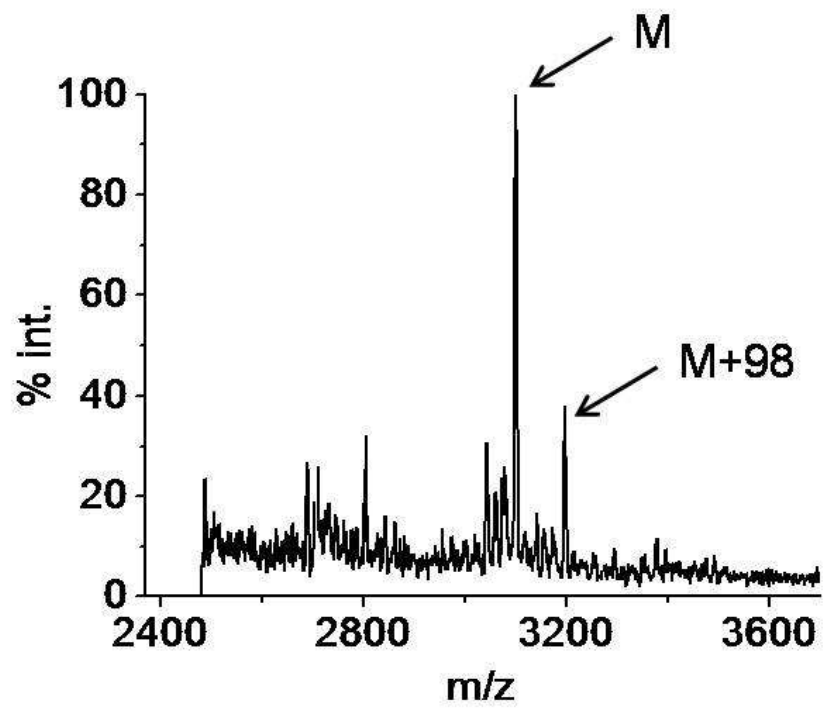

Figure S5. MOLDI-TOF-MS profile of DOX-ACPP.

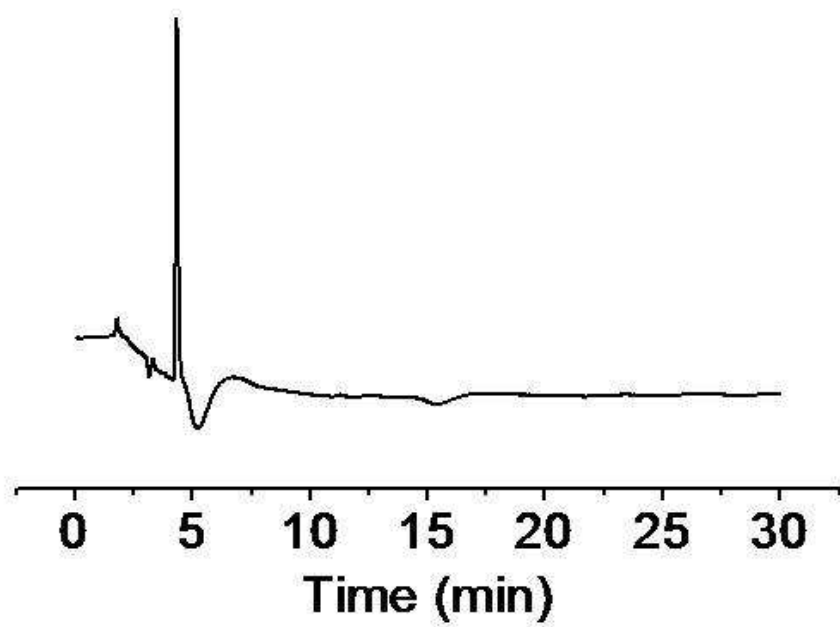

Figure S6. HPLC profile of DOX-ACPP.

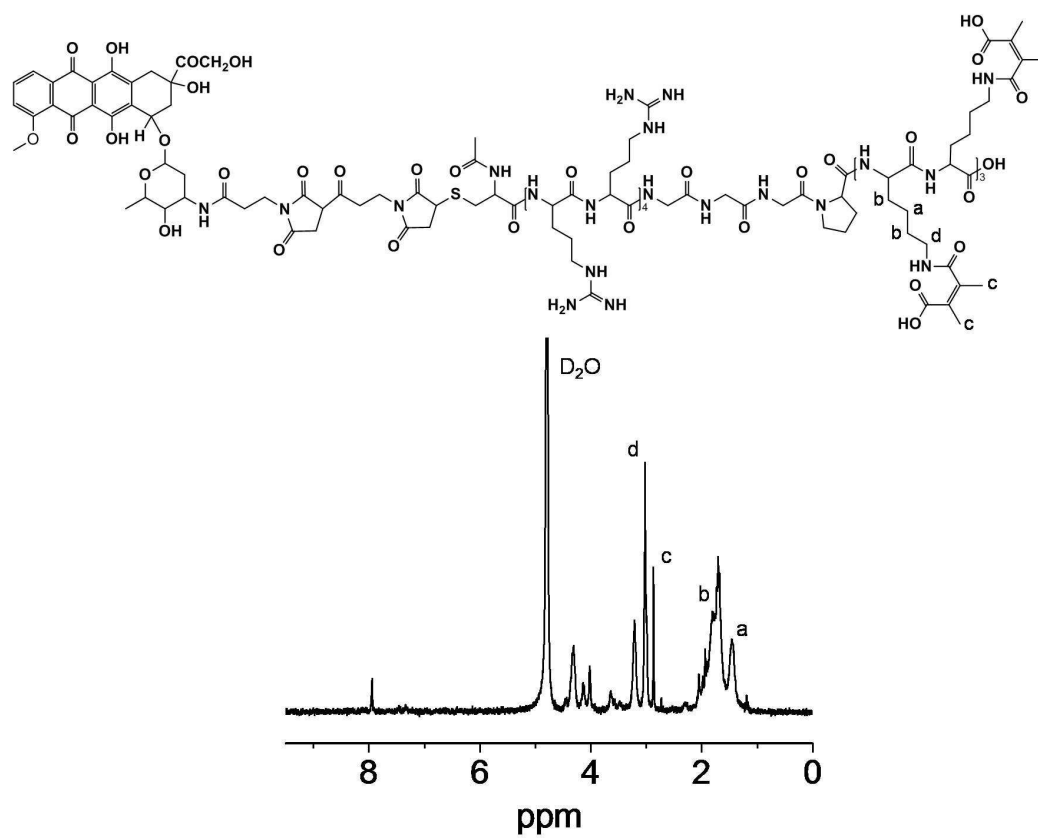

Figure S7.  $^1\text{H}$ NMR spectrum of DOX-ACPP-DMA in  $\text{D}_2\text{O}$ .



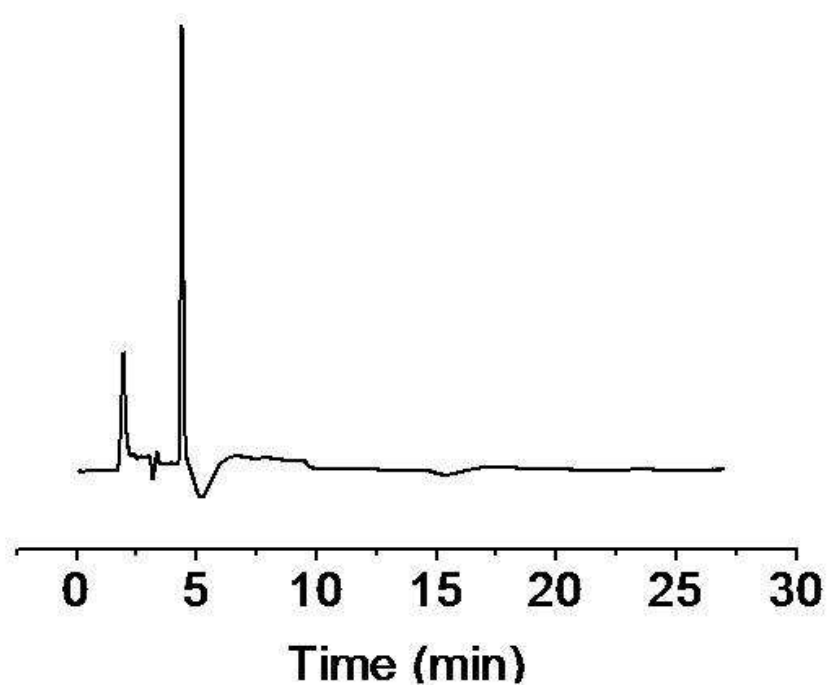

Figure S8. HPLC profile of DOX-ACPP-DMA.

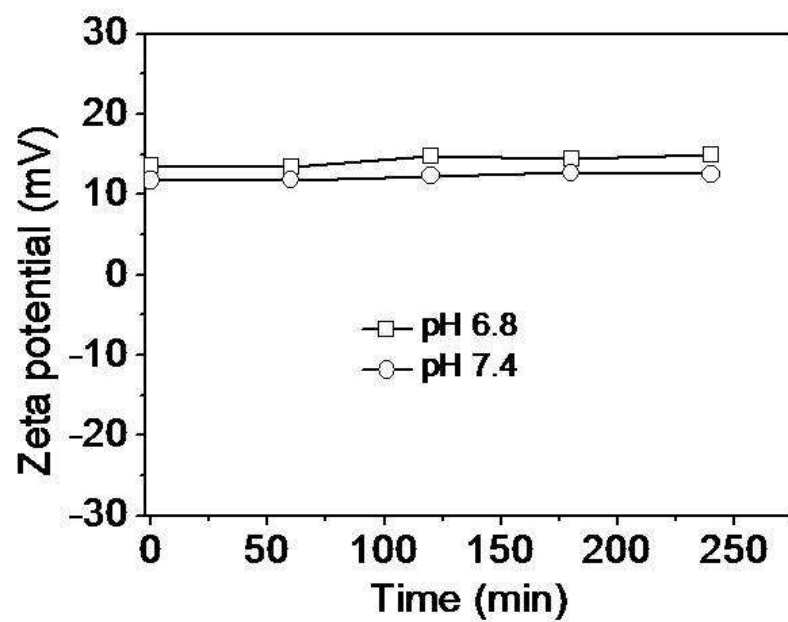

Figure S9. Zeta potential changes of DOX-ACPP exposed at pH 7.4 or 6.8 for different time periods.

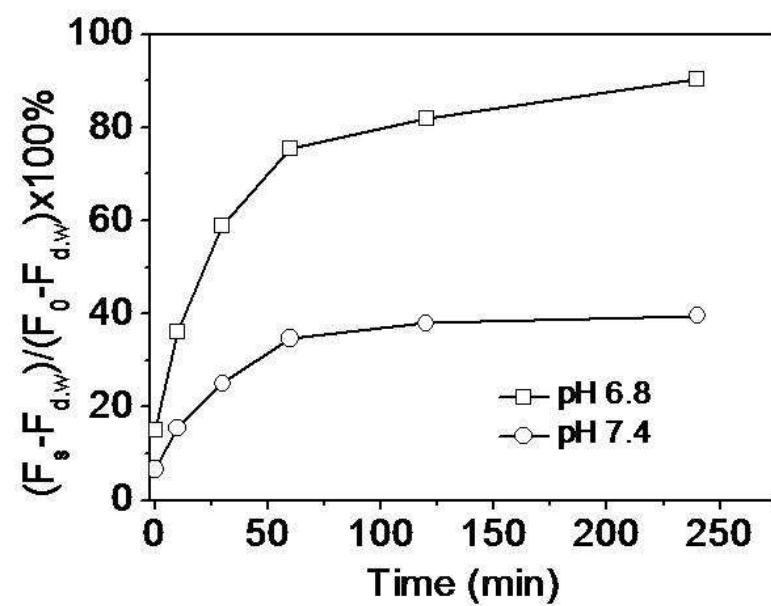

Figure S10. Zeta potential changes of DOX-ACPP exposed at pH 7.4 or 6.8 for different time periods.

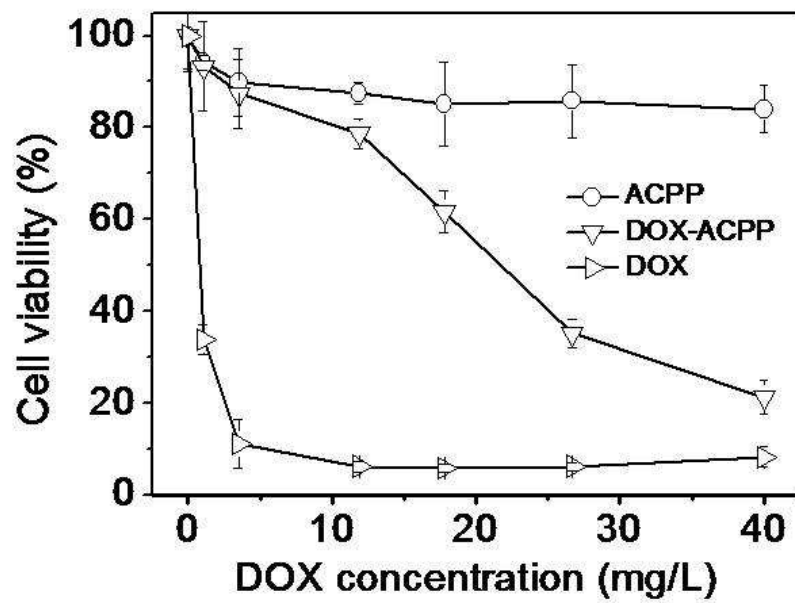

Figure S11. In vitro cell viability assay of ACP, DOX-ACP, and free DOX in HeLa cells at pH 6.8 for 48 h.

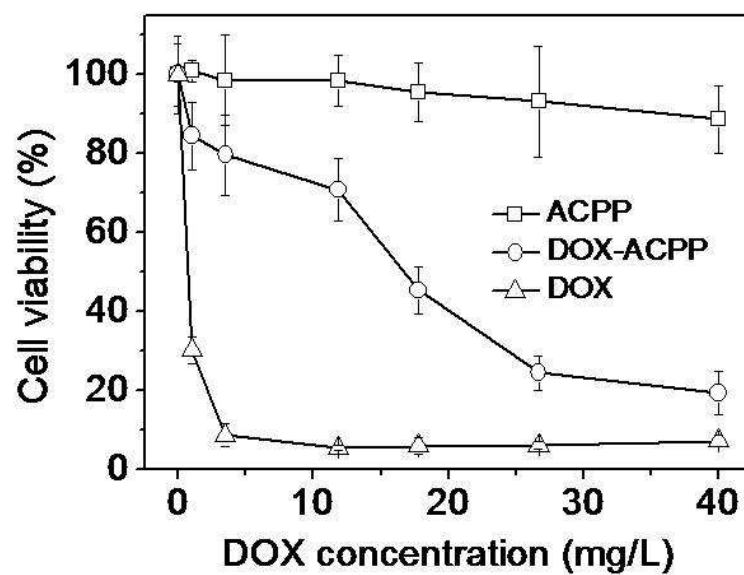

Figure S12. In vitro cell viability assay of ACPP, DOX-ACPP, and free DOX in COS7 cells at pH 7.4 for 48 h.
